# Supplementary figures and images for: Validation of a Novel Fluorescent Lateral Flow Assay for Rapid Qualitative and Quantitative Assessment of Total Anti-SARS-CoV-2 S-RBD Binding Antibody Units (BAU) from Plasma or Fingerstick Whole-Blood of COVID-19 Vaccinees
Source: MDPI journal article supplement (doi:10.3390/vaccines10081318), 2022-08-15

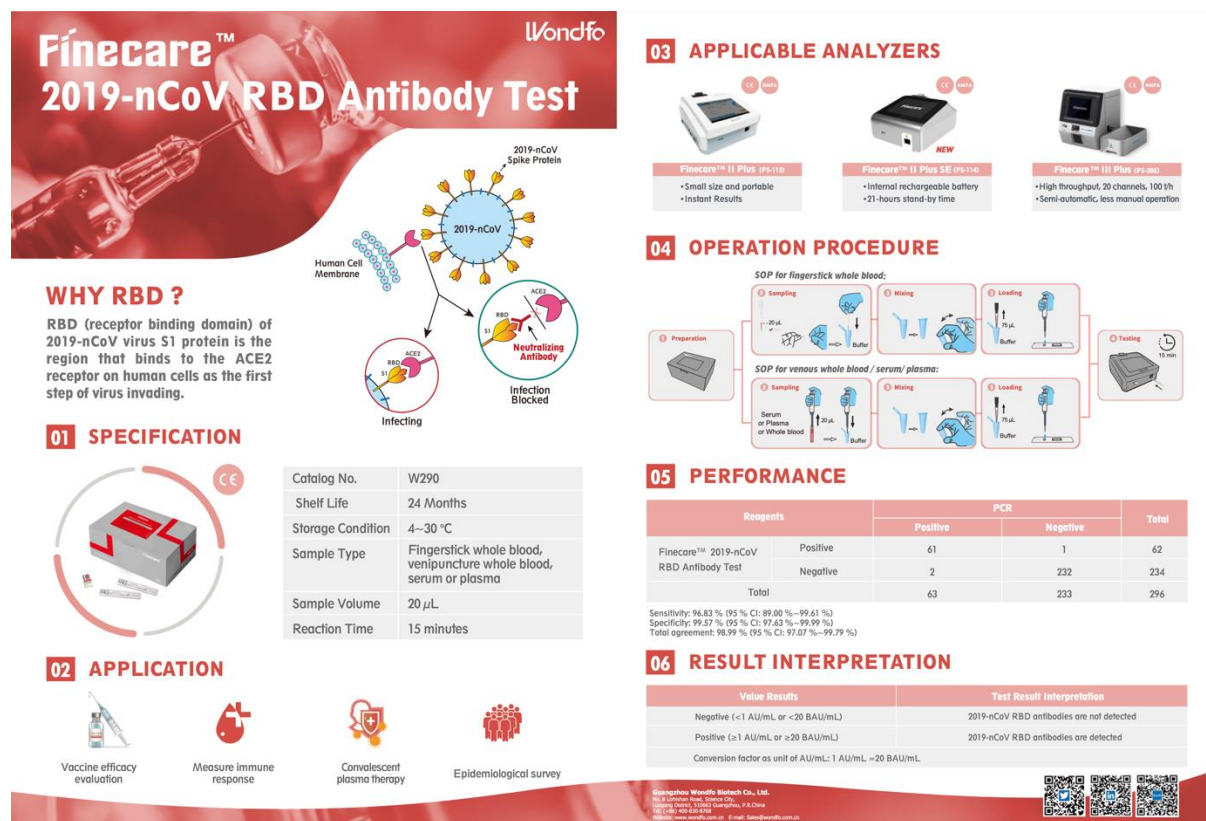

Supplement: s1 [file s1]
